# Supplementary material for: Suicidality and the Onset of Homelessness: Evidence for a Temporal Association From VHA Treatment Records
Source: Atypon-hosted journal article supplement (doi:10.1176/appi.ps.201800415), 2019-07-24
Supplement: appi.ps.201800415.ds001.pdf [file appi.ps.201800415.ds001.pdf]

**Covariates of timing of suicidality-related service use among 16,702 veterans in the Veterans Health Administration<sup>a</sup>**

| Characteristic     | Suicidality-related service use before or after onset of homelessness |     |                        |     | p     |
|--------------------|-----------------------------------------------------------------------|-----|------------------------|-----|-------|
|                    | 0-30 days<br>(N=6,595)                                                |     | >30 days<br>(N=10,107) |     |       |
|                    | N                                                                     | %   | N                      | %   |       |
| Race/ethnicity     |                                                                       |     |                        |     | .196  |
| Hispanic           | 413                                                                   | 6%  | 657                    | 7%  |       |
| Non-Hispanic black | 1,805                                                                 | 27% | 2,902                  | 29% |       |
| Non-Hispanic white | 3,976                                                                 | 60% | 5,974                  | 59% |       |
| Other              | 164                                                                   | 2%  | 254                    | 3%  |       |
| Missing            | 237                                                                   | 4%  | 320                    | 3%  |       |
| Sex                |                                                                       |     |                        |     | <.001 |
| Male               | 6,007                                                                 | 91% | 8,980                  | 89% |       |
| Female             | 588                                                                   | 9%  | 1,127                  | 11% |       |
| Age                |                                                                       |     |                        |     | .020  |
| 18-34              | 1,505                                                                 | 23% | 2,480                  | 25% |       |
| 35-44              | 922                                                                   | 14% | 1,486                  | 15% |       |
| 45-54              | 1,494                                                                 | 23% | 2,273                  | 22% |       |
| 55-64              | 2,050                                                                 | 31% | 2,966                  | 29% |       |
| 65+                | 624                                                                   | 9%  | 902                    | 9%  |       |
| Marital status     |                                                                       |     |                        |     | .055  |
| Married            | 1,106                                                                 | 17% | 1,854                  | 18% |       |
| Single             | 1,849                                                                 | 28% | 2,758                  | 27% |       |
| Divorced/separated | 3,420                                                                 | 52% | 5,186                  | 51% |       |
| Widowed            | 220                                                                   | 3%  | 309                    | 3%  |       |

<sup>a</sup> Proportions were compared by chi square tests.

### Suicidality-related service use 15-60 days from onset of homelessness

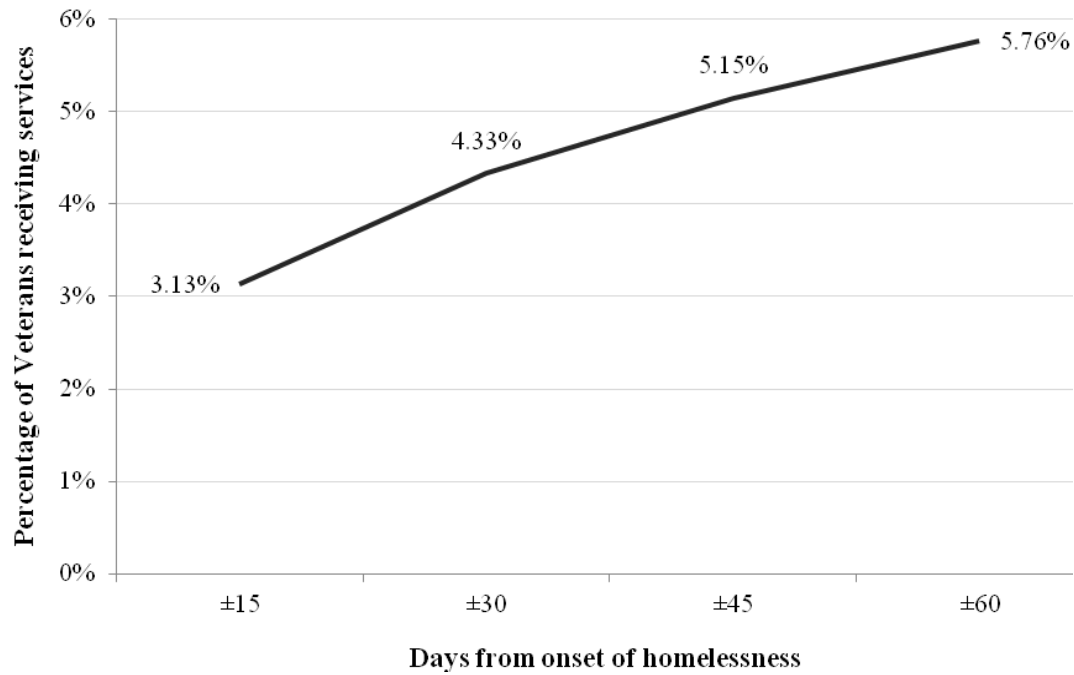

### Ratio of suicidality-related service use around onset of homelessness to service use one year prior

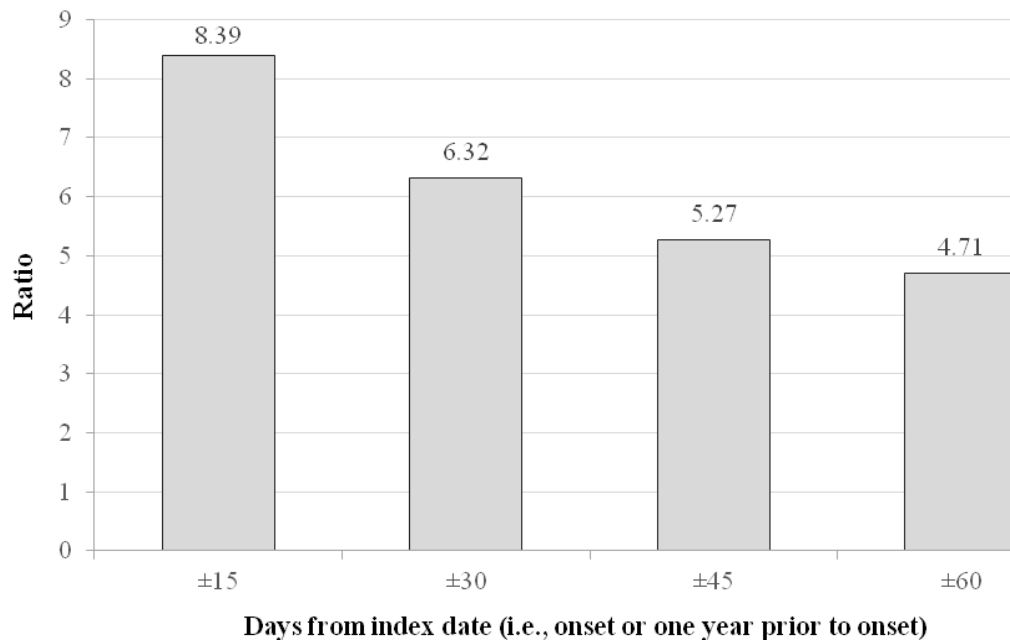

### Evidence of suicidality before and after homeless diagnosis

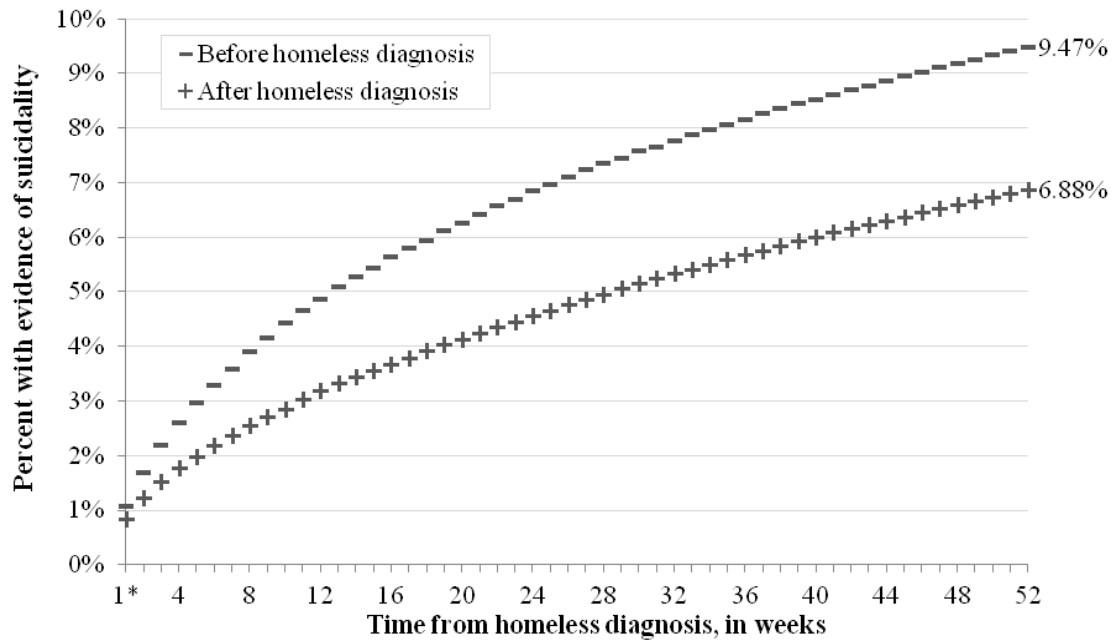

\*Week 1 includes day of homelessness diagnosis.

### Homelessness before and after suicidality-related service use

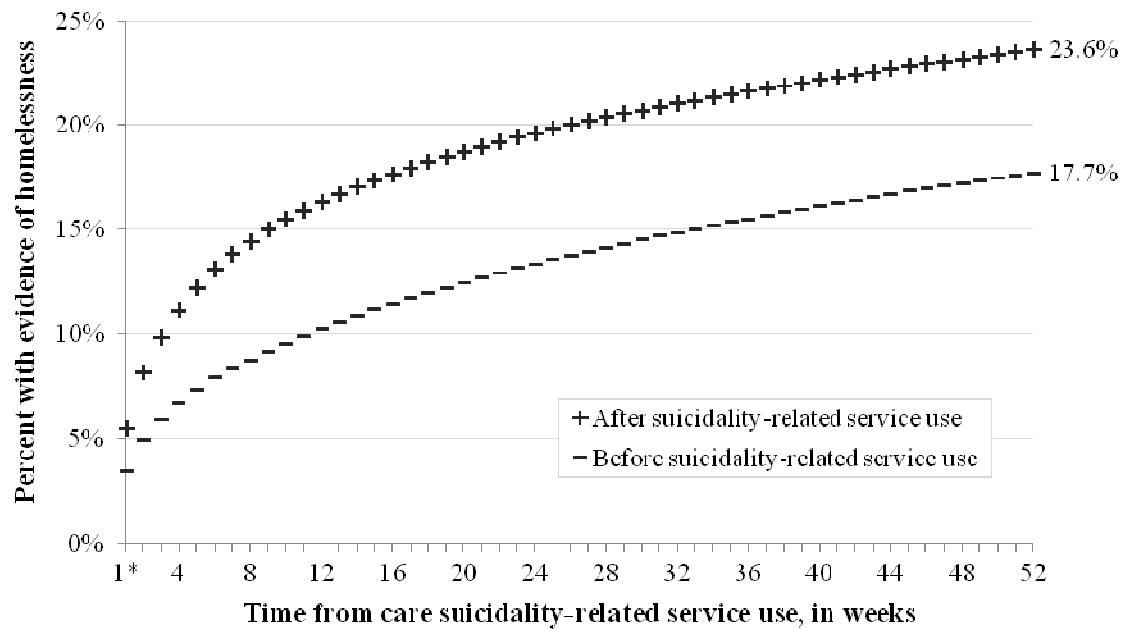

\*Week 1 includes day of care encounter.
